# Supplementary material for: Perilipin 4 in human skeletal muscle: localization and effect of physical activity
Source: PubMed Central journal article supplement (PMC4562567; doi:10.14814/phy2.12481), 2015-08-11

Supplementary Figure 3

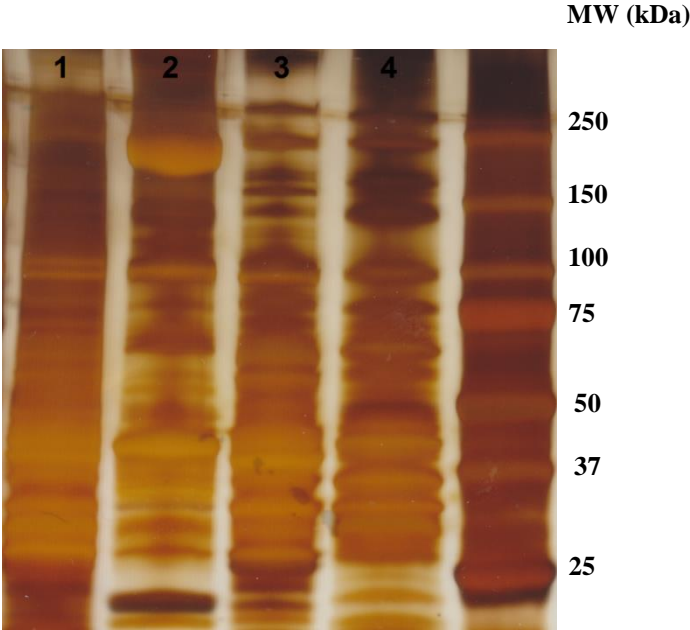

Supplement: phy20003-e12481-sd3.pdf [file phy20003-e12481-sd3.pdf]
