# Supplementary material for: Perilipin 4 in human skeletal muscle: localization and effect of physical activity
Source: PubMed Central journal article supplement (PMC4562567; doi:10.14814/phy2.12481), 2015-08-11
Supplement: phy20003-e12481-sd5.pdf [file phy20003-e12481-sd5.pdf]

Supplementary Figure 5

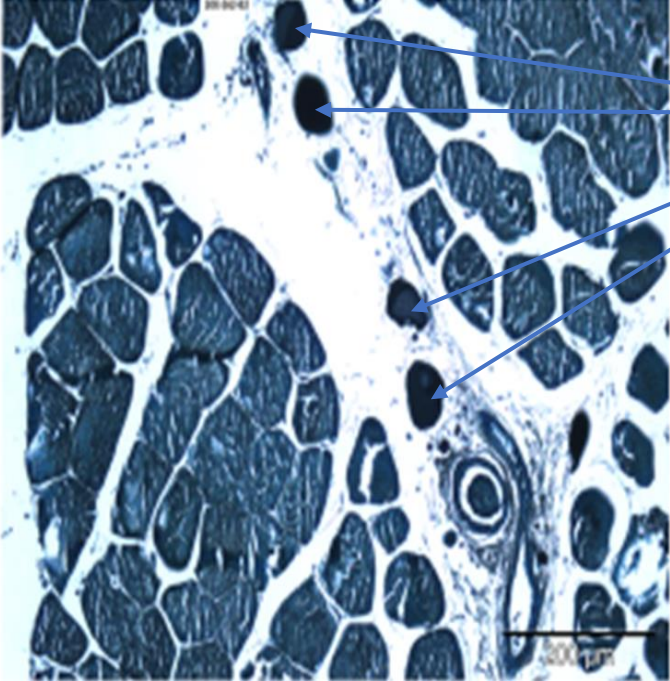

**Intramuscular  
adipocytes**
